# Supplementary material for: Wavelength-dependent intersystem crossing dynamics of phenolic carbonyls in wildfire emissions
Source: Royal Society of Chemistry journal article supplement (doi:10.1039/d4cp03501a), 2024-12-11
Supplement: d4cp03501a1.pdf [file d4cp03501a1.pdf]

## Supplementary material

### Wavelength-dependent intersystem crossing dynamics of phenolic carbonyls in wildfire emissions

Rashid R. Valiev,<sup>a</sup> Yiheng He<sup>b</sup>, Tate Weltzin<sup>b</sup>, Allen Zhu<sup>b</sup>, Dong Lee<sup>b</sup>, Ellery Moore<sup>b</sup>, Aidan Gee<sup>b</sup>, Greg Drozd<sup>b</sup> and Theo Kurten<sup>a</sup>

<sup>a</sup>Department of Chemistry, University of Helsinki, FI-00014 Helsinki, Finland.

<sup>b</sup>Department of Chemistry, Colby College, Waterville, Maine, USA

#### S1. Photochemical loss of Phenolic carbonyls scheme

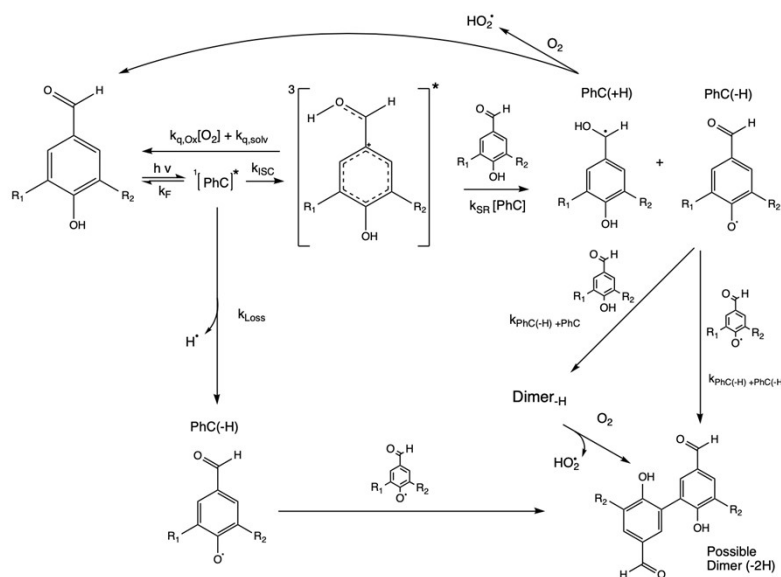

Scheme S1. Photochemical loss of phenolic carbonyls.

Scheme shows a probable mechanism for loss of PhC (phenolic carbonyls) leading to formation of a dimer. Ground state PhC is excited to a singlet state, with efficient ISC to the triplet excited state. At pH = 2 the excited triplet state will be fully protonated. Bimolecular reaction between protonated triplet and ground state PhC forms 2 radicals, a phenoxy and a ketyl, that differ in the number of hydrogens relative to PhC, +1 and -1. (Anastasio 1997) At this point multiple pathways can lead to dimer formation. The two radicals formed can recombine within a solvent cage, followed by abstraction of 2 hydrogens. PhC<sub>-1</sub> may also add to ground state vanillin, due to its relatively high concentration, followed by a single hydrogen abstraction. Combination of two PhC<sub>-1</sub> directly yields the dimer, likely a major route to dimer formation. (Drozd et al. 2024) In the presence of dissolved oxygen, hydrogen abstraction from PH<sub>+1</sub> will regenerate vanillin, reducing the observed quantum yield. Direct photolytic loss of a hydrogen, from either

the singlet or triplet state (shown only for singlet state), has been suggested by Vione et al.(Vione 2019)

#### References

- \*) C. Anastasio, B. C. Faust and C. Janakiram Rao, *Environmental Science & Technology*, 1997, **31**, 218–232.
- \*) D. Vione, A. Albinet, F. Barsotti, M. Mekic, B. Jiang, C. Minero, M. Brigante and S. Gligorovski, *Atmos Environ*, 2019, **206**, 197–207.
- \*) G. T. Drozd, T. Weltzin, S. Skiffington, D. Lee, R. Valiev, T. Kurtén, L. R. Madison, Y. He and L. Gargano, *Environ. Sci.: Atmos.*, 2024, **4**, 509–518

## S2. LED Illumination

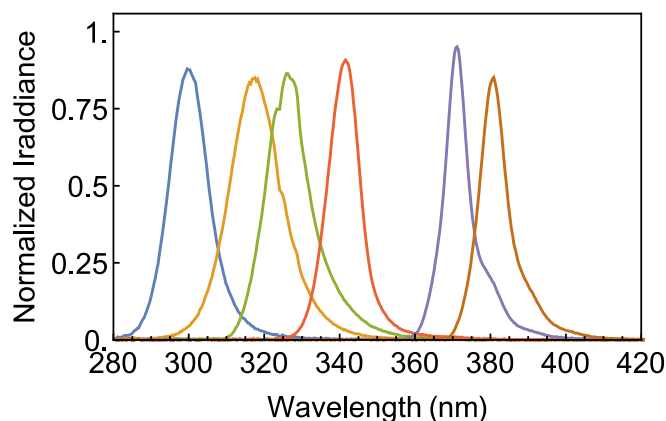

Figure S1. Spectral profiles of LED (light emitted diode) used for quantum yield determinations.

Typical total, volume-averaged photon fluxes were  $2.0 * 10^{15} - 3 * 10^{17} \frac{\text{photons}}{\text{cm}^3 \text{sec}}$ . Greater fluxes were used for longer wavelengths where the molar absorptivity and the fraction of absorbed photons was low.

## S3. Screening Effects

Due to absorption by the sample, the photon flux decreases as light penetrates the solution in the reaction vial; thus the reaction necessarily proceeds at a slower rate at the top of the vial. The light absorption weighted internal screening factor, S, is calculated to account for this effect. S is the ratio of the actual rate of absorption compared to the rate of absorption under optically thin

conditions. All calculated quantum yields are divided by S, to account for artificially slower volume-averaged reaction rates in solutions that are optically thicker (e.g. larger volume or higher concentration). In equation S1,  $\epsilon_\lambda$  is molar absorptivity at a given wavelength,  $l$  is the pathlength,  $PhC$  is the concentration of phenolic carbonyl, and  $I_\lambda$  is the photon flux at a given wavelength.

$$S = \frac{\hat{a}(1 - 10^{-\hat{\mu}_{\hat{a}} * l * [PhC]}) * I_{\hat{a}}}{\hat{a}2.303 * \hat{\mu}_{\hat{a}} * l * [PhC] * I_{\hat{a}}} \quad (S1)$$

#### **S4. Excited electronic energies (in eV) of equilibrium geometries relative to the equilibrium geometry of the ground electronic state.**

| State/Molecule     | S( $\pi\pi^*$ ) | T( $n\pi^*$ ) |
|--------------------|-----------------|---------------|
| Van                | 4.12            | 3.41          |
| Iso-Van            | 4.02            | 3.29          |
| 4HBA               | 4.50            | 3.33          |
| Syr                | 4.03            | 3.39          |
| ConfAld(Trans-I)   | 3.50            | 3.30          |
| ConfAld(Trans-II)  | 3.35            | 3.15          |
| ConfAld(Trans-III) | 3.39            | 3.15          |
| ConfAld(Trans-IV)  | 3.46            | 3.39          |
| ConfAld(Cis-I)     | 4.48            | 4.46          |
| ConfAld(Trans-II)  | 3.37            | 3.21          |

#### **S5. Molecular structures**

## Molecular structures in $S_0$ state

### Van

|   |              |              |              |
|---|--------------|--------------|--------------|
| C | -1.226142000 | 1.303471000  | -0.016496000 |
| C | 0.104946000  | 1.699696000  | -0.042287000 |
| C | -1.562094000 | -0.065160000 | 0.004317000  |
| H | 0.330635000  | 2.759833000  | -0.058638000 |
| C | 1.110460000  | 0.744996000  | -0.046908000 |
| C | -0.563753000 | -1.016604000 | -0.000603000 |
| H | 2.152314000  | 1.046377000  | -0.069002000 |
| H | -0.803338000 | -2.073765000 | 0.015137000  |
| C | 0.782550000  | -0.612219000 | -0.026152000 |
| O | -2.207561000 | 2.225757000  | -0.011773000 |
| H | -3.056213000 | 1.754032000  | 0.005800000  |
| O | -2.903382000 | -0.292324000 | 0.027991000  |
| C | -3.355280000 | -1.638629000 | 0.047238000  |
| H | -3.023815000 | -2.175584000 | -0.846760000 |
| H | -2.997370000 | -2.159005000 | 0.940826000  |
| H | -4.442715000 | -1.594239000 | 0.063014000  |
| C | 1.811272000  | -1.648938000 | -0.030413000 |
| O | 3.020434000  | -1.464140000 | -0.047163000 |
| H | 1.427327000  | -2.685951000 | -0.017030000 |
| O | 4.496296000  | 0.942359000  | -0.002782000 |
| H | 4.519961000  | 1.151570000  | 0.938692000  |

|   |             |             |              |
|---|-------------|-------------|--------------|
| H | 4.035164000 | 0.083844000 | -0.034400000 |
|---|-------------|-------------|--------------|

**IsoVan**

|   |             |              |              |
|---|-------------|--------------|--------------|
| C | 1.464914000 | -0.519390000 | -0.257102000 |
|---|-------------|--------------|--------------|

|   |             |              |              |
|---|-------------|--------------|--------------|
| C | 0.287888000 | -1.261377000 | -0.280320000 |
|---|-------------|--------------|--------------|

|   |             |             |              |
|---|-------------|-------------|--------------|
| C | 1.410592000 | 0.879022000 | -0.120444000 |
|---|-------------|-------------|--------------|

|   |             |              |              |
|---|-------------|--------------|--------------|
| H | 0.371368000 | -2.336094000 | -0.397540000 |
|---|-------------|--------------|--------------|

|   |              |              |              |
|---|--------------|--------------|--------------|
| C | -0.947120000 | -0.644898000 | -0.158700000 |
|---|--------------|--------------|--------------|

|   |             |             |             |
|---|-------------|-------------|-------------|
| C | 0.176819000 | 1.496115000 | 0.014224000 |
|---|-------------|-------------|-------------|

|   |              |              |              |
|---|--------------|--------------|--------------|
| H | -1.862892000 | -1.225640000 | -0.177058000 |
|---|--------------|--------------|--------------|

|   |             |             |             |
|---|-------------|-------------|-------------|
| H | 0.125865000 | 2.576557000 | 0.122383000 |
|---|-------------|-------------|-------------|

|   |              |             |              |
|---|--------------|-------------|--------------|
| C | -1.000933000 | 0.741835000 | -0.003419000 |
|---|--------------|-------------|--------------|

|   |             |              |              |
|---|-------------|--------------|--------------|
| O | 2.651759000 | -1.165939000 | -0.433299000 |
|---|-------------|--------------|--------------|

|   |             |             |              |
|---|-------------|-------------|--------------|
| O | 2.587234000 | 1.556234000 | -0.146252000 |
|---|-------------|-------------|--------------|

|   |              |             |             |
|---|--------------|-------------|-------------|
| C | -2.276650000 | 1.451106000 | 0.139117000 |
|---|--------------|-------------|-------------|

|   |              |             |             |
|---|--------------|-------------|-------------|
| O | -3.382918000 | 0.934496000 | 0.143127000 |
|---|--------------|-------------|-------------|

|   |              |             |             |
|---|--------------|-------------|-------------|
| H | -2.192711000 | 2.547716000 | 0.250702000 |
|---|--------------|-------------|-------------|

|   |              |              |              |
|---|--------------|--------------|--------------|
| O | -4.137550000 | -1.793412000 | -0.015604000 |
|---|--------------|--------------|--------------|

|   |              |              |             |
|---|--------------|--------------|-------------|
| H | -4.046962000 | -2.083124000 | 0.900162000 |
|---|--------------|--------------|-------------|

|   |              |              |             |
|---|--------------|--------------|-------------|
| H | -3.937980000 | -0.840770000 | 0.025848000 |
|---|--------------|--------------|-------------|

|   |             |              |             |
|---|-------------|--------------|-------------|
| C | 3.551516000 | -1.135753000 | 0.678380000 |
|---|-------------|--------------|-------------|

|   |             |              |             |
|---|-------------|--------------|-------------|
| H | 3.091789000 | -1.603921000 | 1.554490000 |
|---|-------------|--------------|-------------|

|   |             |              |             |
|---|-------------|--------------|-------------|
| H | 4.425218000 | -1.713286000 | 0.377417000 |
|---|-------------|--------------|-------------|

|   |             |              |              |
|---|-------------|--------------|--------------|
| H | 3.850331000 | -0.114201000 | 0.919415000  |
| H | 2.425610000 | 2.501770000  | -0.030014000 |

**Syr**

|   |              |              |              |
|---|--------------|--------------|--------------|
| C | -1.208390000 | 1.064362000  | -0.001674000 |
| C | -1.834527000 | -0.187353000 | 0.005208000  |
| C | 0.191858000  | 1.156041000  | -0.016508000 |
| C | -1.049396000 | -1.333896000 | -0.001970000 |
| C | 0.978340000  | 0.019776000  | -0.023378000 |
| H | -1.506448000 | -2.315777000 | 0.003299000  |
| H | 2.059968000  | 0.077374000  | -0.038473000 |
| C | 0.344935000  | -1.228575000 | -0.016413000 |
| O | -1.961210000 | 2.183124000  | 0.005792000  |
| H | -1.350398000 | 2.937960000  | 0.001552000  |
| O | 0.640146000  | 2.441203000  | -0.023136000 |
| C | 2.044812000  | 2.655681000  | -0.013828000 |
| H | 2.500086000  | 2.228865000  | 0.884860000  |
| H | 2.515439000  | 2.216755000  | -0.898310000 |
| H | 2.186835000  | 3.734886000  | -0.019853000 |
| C | 1.124636000  | -2.464160000 | -0.024215000 |
| O | 2.345250000  | -2.543740000 | -0.037011000 |
| H | 0.524786000  | -3.392713000 | -0.017762000 |
| O | 4.278562000  | -0.479365000 | -0.023490000 |

|   |              |              |              |
|---|--------------|--------------|--------------|
| H | 4.385217000  | -0.298700000 | 0.918268000  |
| H | 3.667652000  | -1.239142000 | -0.043877000 |
| O | -3.190327000 | -0.160155000 | 0.019284000  |
| C | -3.872391000 | -1.403859000 | 0.025562000  |
| H | -3.642199000 | -1.990096000 | -0.870147000 |
| H | -3.624700000 | -1.990783000 | 0.916147000  |
| H | -4.934880000 | -1.165267000 | 0.036066000  |

#### **4HBA**

|   |              |              |              |
|---|--------------|--------------|--------------|
| C | 2.161340000  | -0.405683000 | -0.000300000 |
| C | 2.067288000  | 0.988071000  | 0.036299000  |
| C | 1.005285000  | -1.194654000 | -0.039731000 |
| C | 0.820177000  | 1.581989000  | 0.032730000  |
| C | -0.237352000 | -0.591675000 | -0.042733000 |
| H | 0.740373000  | 2.664858000  | 0.060825000  |
| H | -1.137577000 | -1.197397000 | -0.075380000 |
| C | -0.344303000 | 0.805316000  | -0.006705000 |
| O | 3.399496000  | -0.940562000 | 0.003758000  |
| H | 3.346816000  | -1.905464000 | -0.024213000 |
| C | -1.639168000 | 1.478304000  | -0.009615000 |
| O | -2.734635000 | 0.934163000  | -0.038932000 |
| H | -1.588708000 | 2.582592000  | 0.017453000  |
| O | -3.393423000 | -1.810441000 | -0.044140000 |

|   |              |              |              |
|---|--------------|--------------|--------------|
| H | -3.376742000 | -2.029268000 | 0.895293000  |
| H | -3.224888000 | -0.850159000 | -0.058199000 |
| H | 1.092726000  | -2.276787000 | -0.067408000 |
| H | 2.976896000  | 1.576340000  | 0.066470000  |

### **ConfAld**

#### **Trans-I**

|   |              |              |              |
|---|--------------|--------------|--------------|
| C | -2.858329000 | -0.564300000 | 0.013589000  |
| C | -2.412306000 | -1.874350000 | 0.028263000  |
| C | -1.927407000 | 0.496443000  | -0.007233000 |
| H | -3.140758000 | -2.676741000 | 0.044111000  |
| C | -1.046780000 | -2.135476000 | 0.022180000  |
| C | -0.574602000 | 0.235521000  | -0.013148000 |
| H | -0.699963000 | -3.163561000 | 0.033514000  |
| H | 0.133975000  | 1.053139000  | -0.029159000 |
| C | -0.114064000 | -1.097002000 | 0.001553000  |
| O | -4.179297000 | -0.288012000 | 0.018826000  |
| H | -4.276379000 | 0.677788000  | 0.005837000  |
| O | -2.513773000 | 1.724157000  | -0.019904000 |
| C | -1.676218000 | 2.870743000  | -0.043264000 |
| H | -1.038839000 | 2.908656000  | 0.845481000  |
| H | -1.051853000 | 2.881781000  | -0.941923000 |
| H | -2.341119000 | 3.732521000  | -0.051312000 |



|   |             |              |              |
|---|-------------|--------------|--------------|
| C | 3.696138000 | -1.119067000 | -0.026993000 |
| O | 4.718732000 | -0.440384000 | -0.042117000 |
| H | 3.777193000 | -2.222025000 | -0.015587000 |
| O | 3.995582000 | 2.277134000  | -0.011608000 |
| H | 3.898407000 | 2.450649000  | 0.932149000  |
| H | 4.359393000 | 1.371019000  | -0.041325000 |
| C | 1.301206000 | -1.428070000 | -0.004365000 |
| H | 1.519747000 | -2.495491000 | 0.007967000  |
| C | 2.350828000 | -0.584161000 | -0.022808000 |
| H | 2.259449000 | 0.497415000  | -0.037970000 |

### **Trans-II**

|   |              |              |              |
|---|--------------|--------------|--------------|
| C | -2.584165000 | -0.931959000 | 0.020150000  |
| C | -1.774622000 | -2.058891000 | 0.037693000  |
| C | -2.003753000 | 0.349097000  | -0.011486000 |
| H | -2.242941000 | -3.036234000 | 0.062251000  |
| C | -0.394162000 | -1.921747000 | 0.024004000  |
| C | -0.629969000 | 0.483929000  | -0.024798000 |
| H | 0.222147000  | -2.813120000 | 0.038430000  |
| H | -0.173370000 | 1.466220000  | -0.049309000 |
| C | 0.198084000  | -0.655421000 | -0.007279000 |
| O | -3.928597000 | -1.056633000 | 0.033458000  |
| H | -4.305480000 | -0.162267000 | 0.017219000  |

|   |              |              |              |
|---|--------------|--------------|--------------|
| O | -2.916736000 | 1.359183000  | -0.025780000 |
| C | -2.437856000 | 2.695540000  | -0.056369000 |
| H | -1.832537000 | 2.915678000  | 0.828355000  |
| H | -1.846390000 | 2.879929000  | -0.958454000 |
| H | -3.319117000 | 3.334517000  | -0.062350000 |
| C | 4.017001000  | -1.022382000 | -0.033778000 |
| O | 4.477005000  | 0.115606000  | -0.050054000 |
| H | 4.718700000  | -1.875191000 | -0.032225000 |
| O | 3.117879000  | 2.581537000  | 0.017161000  |
| H | 2.986058000  | 2.719796000  | 0.962882000  |
| H | 3.648777000  | 1.763440000  | -0.022809000 |
| C | 1.637163000  | -0.446044000 | -0.022298000 |
| H | 1.952161000  | 0.595833000  | -0.040923000 |
| C | 2.607026000  | -1.382348000 | -0.016125000 |
| H | 2.387096000  | -2.444789000 | 0.000366000  |

### **Trans-III**

|   |             |              |              |
|---|-------------|--------------|--------------|
| C | 2.420818000 | -1.157213000 | -0.016293000 |
| C | 1.380986000 | -2.070304000 | -0.042761000 |
| C | 2.142851000 | 0.226577000  | 0.005774000  |
| H | 1.612485000 | -3.129042000 | -0.059212000 |
| C | 0.067569000 | -1.614897000 | -0.047558000 |
| C | 0.840528000 | 0.675906000  | 0.000443000  |

|   |              |              |              |
|---|--------------|--------------|--------------|
| H | -0.747916000 | -2.330421000 | -0.068243000 |
| H | 0.636261000  | 1.738416000  | 0.017592000  |
| C | -0.223667000 | -0.249073000 | -0.026663000 |
| O | 3.703524000  | -1.576651000 | -0.011008000 |
| H | 4.269889000  | -0.788394000 | 0.008505000  |
| O | 3.263957000  | 0.997636000  | 0.031532000  |
| C | 3.109860000  | 2.408920000  | 0.056388000  |
| H | 2.584373000  | 2.761478000  | -0.836377000 |
| H | 2.565923000  | 2.728023000  | 0.950740000  |
| H | 4.115804000  | 2.824366000  | 0.074530000  |
| C | -3.544102000 | 1.672922000  | -0.030439000 |
| O | -4.437616000 | 0.831184000  | -0.041789000 |
| H | -3.825469000 | 2.741011000  | -0.026339000 |
| O | -4.235968000 | -1.974175000 | 0.019400000  |
| H | -4.162002000 | -2.157371000 | 0.963744000  |
| H | -4.373471000 | -1.008484000 | -0.016588000 |
| C | -1.618749000 | 0.157269000  | -0.033243000 |
| H | -2.335081000 | -0.662245000 | -0.049990000 |
| C | -2.112856000 | 1.411849000  | -0.021705000 |
| H | -1.471398000 | 2.286971000  | -0.007103000 |

**Trans-IV**

|   |              |             |              |
|---|--------------|-------------|--------------|
| C | -2.393368000 | 1.243260000 | -0.013623000 |
|---|--------------|-------------|--------------|

|   |              |              |              |
|---|--------------|--------------|--------------|
| C | -1.191245000 | 1.935591000  | -0.031606000 |
| C | -2.393004000 | -0.163450000 | 0.005407000  |
| H | -1.213928000 | 3.019254000  | -0.045999000 |
| C | 0.009428000  | 1.240489000  | -0.031098000 |
| C | -1.197265000 | -0.853811000 | 0.005712000  |
| H | 0.939349000  | 1.796730000  | -0.045493000 |
| H | -1.189610000 | -1.937144000 | 0.020133000  |
| C | 0.026221000  | -0.157272000 | -0.012599000 |
| O | -3.566679000 | 1.911476000  | -0.014226000 |
| H | -4.279158000 | 1.252386000  | -0.000569000 |
| O | -3.641490000 | -0.705975000 | 0.022114000  |
| C | -3.760014000 | -2.120704000 | 0.041094000  |
| H | -3.307044000 | -2.564495000 | -0.850783000 |
| H | -3.292564000 | -2.541778000 | 0.936519000  |
| H | -4.826937000 | -2.336339000 | 0.052454000  |
| C | 3.626203000  | -1.406037000 | -0.023024000 |
| O | 4.812587000  | -1.091748000 | -0.033668000 |
| H | 3.348477000  | -2.476530000 | -0.010098000 |
| O | 5.000782000  | 1.715015000  | -0.014524000 |
| H | 4.957169000  | 1.915330000  | 0.927904000  |
| H | 5.054180000  | 0.739931000  | -0.038820000 |
| C | 1.259140000  | -0.929647000 | -0.011630000 |
| H | 1.125444000  | -2.011129000 | 0.002588000  |

|   |             |              |              |
|---|-------------|--------------|--------------|
| C | 2.523920000 | -0.467256000 | -0.025794000 |
| H | 2.782926000 | 0.586667000  | -0.042442000 |

**CIS-I**

|   |              |              |              |
|---|--------------|--------------|--------------|
| C | 2.783986000  | 0.001390000  | 0.012255000  |
| C | 2.795342000  | -1.384531000 | 0.020372000  |
| C | 1.555443000  | 0.690649000  | -0.002250000 |
| H | 3.747203000  | -1.902767000 | 0.031442000  |
| C | 1.593936000  | -2.077713000 | 0.014136000  |
| C | 0.360964000  | 0.003558000  | -0.008177000 |
| H | 1.610105000  | -3.162559000 | 0.020333000  |
| H | -0.584799000 | 0.525653000  | -0.018945000 |
| C | 0.361751000  | -1.407645000 | -0.000006000 |
| O | 3.939225000  | 0.697086000  | 0.018123000  |
| H | 3.711532000  | 1.640955000  | 0.010693000  |
| O | 1.700281000  | 2.045747000  | -0.009096000 |
| C | 0.525202000  | 2.842312000  | -0.023943000 |
| H | -0.070649000 | 2.645576000  | -0.920421000 |
| H | -0.085671000 | 2.656725000  | 0.864783000  |
| H | 0.859526000  | 3.878338000  | -0.027578000 |
| C | -2.961847000 | -0.816656000 | -0.028410000 |
| O | -2.575851000 | 0.351776000  | -0.029558000 |
| H | -4.050522000 | -0.997540000 | -0.037007000 |
| O | -5.116117000 | 1.489191000  | -0.044331000 |

|   |              |              |              |
|---|--------------|--------------|--------------|
| H | -5.337345000 | 1.505294000  | 0.893992000  |
| H | -4.159918000 | 1.296169000  | -0.051163000 |
| C | -0.825889000 | -2.244325000 | -0.005435000 |
| H | -0.568459000 | -3.302076000 | 0.001467000  |
| C | -2.166993000 | -2.028819000 | -0.016994000 |
| H | -2.782672000 | -2.923484000 | -0.017975000 |

**Cis-II**

|   |              |              |              |
|---|--------------|--------------|--------------|
| C | -1.907562000 | 1.284396000  | -0.345426000 |
| C | -0.661392000 | 1.566989000  | -0.876882000 |
| C | -2.202675000 | -0.021556000 | 0.092472000  |
| H | -0.462118000 | 2.568772000  | -1.239797000 |
| C | 0.304053000  | 0.568187000  | -0.955881000 |
| C | -1.249520000 | -1.015351000 | 0.001035000  |
| H | 1.255740000  | 0.792810000  | -1.422113000 |
| H | -1.474039000 | -2.022511000 | 0.331061000  |
| C | 0.034177000  | -0.724255000 | -0.501331000 |
| O | -2.853840000 | 2.245923000  | -0.263367000 |
| H | -3.648677000 | 1.842064000  | 0.119991000  |
| O | -3.468363000 | -0.157589000 | 0.573277000  |
| C | -3.882942000 | -1.437726000 | 1.026876000  |
| H | -3.841140000 | -2.173158000 | 0.217663000  |
| H | -3.263110000 | -1.777284000 | 1.862348000  |
| H | -4.912477000 | -1.322895000 | 1.361212000  |

|   |             |              |              |
|---|-------------|--------------|--------------|
| C | 3.101038000 | -0.593195000 | 0.018440000  |
| O | 4.327867000 | -0.566946000 | 0.051494000  |
| H | 2.532951000 | 0.278411000  | 0.378842000  |
| O | 4.478572000 | 1.980102000  | 1.141406000  |
| H | 4.401620000 | 1.805014000  | 2.086462000  |
| H | 4.640964000 | 1.097500000  | 0.756838000  |
| C | 1.010635000 | -1.812142000 | -0.563552000 |
| H | 0.583228000 | -2.796263000 | -0.747501000 |
| C | 2.350045000 | -1.756475000 | -0.422266000 |
| H | 2.938031000 | -2.657604000 | -0.568395000 |

**Molecular structures in the first excited  $\pi\pi^*$  singlet state.**

**Van S<sub>2</sub>**

|   |              |              |              |
|---|--------------|--------------|--------------|
| C | -2.048048000 | -0.472772000 | 0.038239000  |
| C | -1.723625000 | -1.835510000 | 0.057907000  |
| C | -0.975574000 | 0.486287000  | -0.024970000 |
| H | -2.524322000 | -2.564486000 | 0.100989000  |
| C | -0.409014000 | -2.220257000 | 0.022591000  |
| C | 0.374263000  | 0.100009000  | -0.061985000 |
| H | -0.162227000 | -3.277705000 | 0.037870000  |
| H | 1.162037000  | 0.841744000  | -0.102271000 |
| C | 0.691030000  | -1.264059000 | -0.033819000 |

|   |              |              |              |
|---|--------------|--------------|--------------|
| O | -3.325483000 | -0.067379000 | 0.074261000  |
| H | -3.352569000 | 0.903783000  | 0.054090000  |
| O | -1.404406000 | 1.739129000  | -0.040867000 |
| C | -0.470628000 | 2.826790000  | -0.115562000 |
| H | 0.213871000  | 2.791023000  | 0.732824000  |
| H | 0.087897000  | 2.769954000  | -1.050841000 |
| H | -1.073312000 | 3.730274000  | -0.084329000 |
| C | 2.053271000  | -1.717345000 | -0.059355000 |
| O | 3.069124000  | -0.965828000 | -0.102385000 |
| H | 2.195157000  | -2.810234000 | -0.041840000 |
| O | 3.187271000  | 1.739151000  | 0.110527000  |
| H | 3.113104000  | 1.879172000  | 1.062065000  |
| H | 3.178271000  | 0.757030000  | 0.020878000  |

**IsoVan S<sub>2</sub>**

|   |              |              |              |
|---|--------------|--------------|--------------|
| C | 1.455697000  | -0.613969000 | -0.025081000 |
| C | 0.235376000  | -1.318262000 | -0.067447000 |
| C | 1.381178000  | 0.828560000  | 0.016245000  |
| H | 0.289117000  | -2.400681000 | -0.101383000 |
| C | -0.968345000 | -0.674192000 | -0.065593000 |
| C | 0.144606000  | 1.494720000  | 0.020681000  |
| H | -1.892437000 | -1.241721000 | -0.098207000 |
| H | 0.144365000  | 2.580194000  | 0.055645000  |



|   |              |              |              |
|---|--------------|--------------|--------------|
| C | -1.056328000 | 0.783317000  | -0.019808000 |
| O | 2.566107000  | -1.358651000 | -0.038711000 |
| O | 2.524097000  | 1.503916000  | 0.048174000  |
| C | -2.323597000 | 1.451860000  | -0.017470000 |
| O | -3.449032000 | 0.876656000  | -0.053033000 |
| H | -2.282659000 | 2.552498000  | 0.016533000  |
| O | -4.124244000 | -1.750223000 | 0.007345000  |
| H | -4.072298000 | -1.955081000 | 0.948352000  |
| H | -3.895547000 | -0.792552000 | -0.030781000 |
| C | 3.888058000  | -0.825640000 | 0.036553000  |
| H | 4.027447000  | -0.253743000 | 0.956439000  |
| H | 4.542804000  | -1.694991000 | 0.030838000  |
| H | 4.101861000  | -0.186499000 | -0.822558000 |
| H | 2.362048000  | 2.460623000  | 0.066446000  |

#### **4HBA S<sub>2</sub>**

|   |              |              |              |
|---|--------------|--------------|--------------|
| C | 2.154157000  | -0.431902000 | -0.002575000 |
| C | 2.077688000  | 1.001393000  | 0.062315000  |
| C | 0.974508000  | -1.214232000 | -0.066336000 |
| C | 0.863555000  | 1.613918000  | 0.059439000  |
| C | -0.249325000 | -0.608018000 | -0.070282000 |
| H | 0.794870000  | 2.695382000  | 0.108010000  |
| H | -1.162072000 | -1.190102000 | -0.117654000 |
| C | -0.351038000 | 0.844021000  | -0.009352000 |

|   |              |              |              |
|---|--------------|--------------|--------------|
| O | 3.378433000  | -0.954623000 | 0.002773000  |
| H | 3.348204000  | -1.923950000 | -0.043315000 |
| C | -1.635520000 | 1.496131000  | -0.019149000 |
| O | -2.738338000 | 0.877909000  | -0.082768000 |
| H | -1.626436000 | 2.595781000  | 0.029609000  |
| O | -3.382109000 | -1.779481000 | 0.004178000  |
| H | -3.313649000 | -1.978057000 | 0.945559000  |
| H | -3.174133000 | -0.820047000 | -0.041581000 |
| H | 1.059515000  | -2.296241000 | -0.110863000 |
| H | 3.005660000  | 1.558928000  | 0.112411000  |

**Syr S<sub>1</sub>**

|   |              |              |              |
|---|--------------|--------------|--------------|
| C | -1.203237000 | 1.087407000  | 0.013770000  |
| C | -1.827768000 | -0.207215000 | 0.017490000  |
| C | 0.202778000  | 1.161833000  | -0.032986000 |
| C | -1.059295000 | -1.383031000 | -0.022302000 |
| C | 0.965302000  | 0.025292000  | -0.073147000 |
| H | -1.541449000 | -2.351363000 | -0.017001000 |
| H | 2.047275000  | 0.072755000  | -0.102561000 |
| C | 0.335168000  | -1.295681000 | -0.063687000 |
| O | -1.965095000 | 2.186400000  | 0.053245000  |
| H | -1.365908000 | 2.953971000  | 0.038915000  |
| O | 0.655895000  | 2.442061000  | -0.031001000 |

|   |              |              |              |
|---|--------------|--------------|--------------|
| C | 2.059901000  | 2.648796000  | -0.131276000 |
| H | 2.585536000  | 2.178767000  | 0.704540000  |
| H | 2.444846000  | 2.242946000  | -1.071333000 |
| H | 2.209791000  | 3.726396000  | -0.104358000 |
| C | 1.147120000  | -2.475715000 | -0.098926000 |
| O | 2.412795000  | -2.482069000 | -0.137073000 |
| H | 0.601594000  | -3.432389000 | -0.097150000 |
| O | 4.203334000  | -0.474219000 | 0.202392000  |
| H | 4.169690000  | -0.319120000 | 1.153767000  |
| H | 3.575003000  | -1.222522000 | 0.069495000  |
| O | -3.147019000 | -0.164275000 | 0.060565000  |
| C | -3.903375000 | -1.380599000 | 0.064701000  |
| H | -3.706636000 | -1.948268000 | -0.846489000 |
| H | -3.652879000 | -1.975846000 | 0.944554000  |
| H | -4.945709000 | -1.075022000 | 0.100771000  |

**ConAld S<sub>1</sub>**

**Trans-I**

|   |              |              |              |
|---|--------------|--------------|--------------|
| C | -2.861328000 | -0.515788000 | 0.021622000  |
| C | -2.463613000 | -1.865931000 | 0.039718000  |
| C | -1.875305000 | 0.519021000  | -0.013270000 |
| H | -3.229226000 | -2.632402000 | 0.064185000  |
| C | -1.135025000 | -2.172833000 | 0.026399000  |
| C | -0.534898000 | 0.218604000  | -0.026361000 |

|   |              |              |              |
|---|--------------|--------------|--------------|
| H | -0.817820000 | -3.209917000 | 0.040448000  |
| H | 0.199202000  | 1.010617000  | -0.053332000 |
| C | -0.110562000 | -1.146030000 | -0.005020000 |
| O | -4.152366000 | -0.200098000 | 0.035674000  |
| H | -4.234852000 | 0.770876000  | 0.019807000  |
| O | -2.426123000 | 1.745980000  | -0.029647000 |
| C | -1.569994000 | 2.886137000  | -0.062031000 |
| H | -0.931328000 | 2.910028000  | 0.824641000  |
| H | -0.954369000 | 2.876590000  | -0.965079000 |
| H | -2.226614000 | 3.753080000  | -0.069730000 |
| C | 3.687244000  | -1.109925000 | -0.037651000 |
| O | 4.704646000  | -0.371436000 | -0.048577000 |
| H | 3.829779000  | -2.207017000 | -0.033161000 |
| O | 3.912489000  | 2.251252000  | 0.024881000  |
| H | 3.774111000  | 2.390442000  | 0.968991000  |
| H | 4.267676000  | 1.333647000  | -0.020676000 |
| C | 1.245431000  | -1.530908000 | -0.012128000 |
| H | 1.451390000  | -2.598220000 | 0.000192000  |
| C | 2.343692000  | -0.653616000 | -0.030381000 |
| H | 2.209025000  | 0.424298000  | -0.040319000 |

**Trans-II**

|   |              |              |             |
|---|--------------|--------------|-------------|
| C | -2.584590000 | -0.956650000 | 0.021820000 |
| C | -1.728211000 | -2.064172000 | 0.038960000 |

|   |              |              |              |
|---|--------------|--------------|--------------|
| C | -2.037578000 | 0.369638000  | -0.011075000 |
| H | -2.165251000 | -3.055696000 | 0.063880000  |
| C | -0.371626000 | -1.877183000 | 0.023781000  |
| C | -0.681170000 | 0.564613000  | -0.026805000 |
| H | 0.279612000  | -2.741303000 | 0.036944000  |
| H | -0.264811000 | 1.563484000  | -0.052047000 |
| C | 0.210140000  | -0.549679000 | -0.010470000 |
| O | -3.903446000 | -1.121987000 | 0.035714000  |
| H | -4.326519000 | -0.244403000 | 0.019228000  |
| O | -2.992715000 | 1.314412000  | -0.023005000 |
| C | -2.602051000 | 2.686085000  | -0.057023000 |
| H | -2.010013000 | 2.935979000  | 0.826963000  |
| H | -2.027642000 | 2.896651000  | -0.962628000 |
| H | -3.525538000 | 3.260364000  | -0.060507000 |
| C | 3.974987000  | -1.082110000 | -0.032589000 |
| O | 4.516841000  | 0.052248000  | -0.063210000 |
| H | 4.627900000  | -1.971908000 | -0.019532000 |
| O | 3.380561000  | 2.538099000  | 0.027413000  |
| H | 3.207437000  | 2.648537000  | 0.969755000  |
| H | 3.796837000  | 1.647885000  | -0.023984000 |
| C | 1.601767000  | -0.330331000 | -0.027989000 |
| H | 1.943994000  | 0.699342000  | -0.055880000 |
| C | 2.578747000  | -1.345139000 | -0.013693000 |

|   |             |              |             |
|---|-------------|--------------|-------------|
| H | 2.291575000 | -2.391532000 | 0.013010000 |
|---|-------------|--------------|-------------|

**Trans-III**

|   |             |              |              |
|---|-------------|--------------|--------------|
| C | 2.454455000 | -1.145048000 | -0.018623000 |
|---|-------------|--------------|--------------|

|   |             |              |              |
|---|-------------|--------------|--------------|
| C | 1.427064000 | -2.105196000 | -0.056035000 |
|---|-------------|--------------|--------------|

|   |             |             |             |
|---|-------------|-------------|-------------|
| C | 2.131801000 | 0.246141000 | 0.009788000 |
|---|-------------|-------------|-------------|

|   |             |              |              |
|---|-------------|--------------|--------------|
| H | 1.697421000 | -3.154370000 | -0.076835000 |
|---|-------------|--------------|--------------|

|   |             |              |              |
|---|-------------|--------------|--------------|
| C | 0.126028000 | -1.693813000 | -0.064815000 |
|---|-------------|--------------|--------------|

|   |             |             |             |
|---|-------------|-------------|-------------|
| C | 0.825366000 | 0.667758000 | 0.000457000 |
|---|-------------|-------------|-------------|

|   |              |              |              |
|---|--------------|--------------|--------------|
| H | -0.674937000 | -2.424617000 | -0.093240000 |
|---|--------------|--------------|--------------|

|   |             |             |             |
|---|-------------|-------------|-------------|
| H | 0.597024000 | 1.723558000 | 0.023100000 |
|---|-------------|-------------|-------------|

|   |              |              |              |
|---|--------------|--------------|--------------|
| C | -0.234642000 | -0.291433000 | -0.037545000 |
|---|--------------|--------------|--------------|

|   |             |              |              |
|---|-------------|--------------|--------------|
| O | 3.727122000 | -1.528815000 | -0.010321000 |
|---|-------------|--------------|--------------|

|   |             |              |             |
|---|-------------|--------------|-------------|
| H | 4.290081000 | -0.733650000 | 0.015931000 |
|---|-------------|--------------|-------------|

|   |             |             |             |
|---|-------------|-------------|-------------|
| O | 3.230825000 | 1.023733000 | 0.044395000 |
|---|-------------|-------------|-------------|

|   |             |             |             |
|---|-------------|-------------|-------------|
| C | 3.069835000 | 2.439790000 | 0.072964000 |
|---|-------------|-------------|-------------|

|   |             |             |              |
|---|-------------|-------------|--------------|
| H | 2.544846000 | 2.783804000 | -0.821973000 |
|---|-------------|-------------|--------------|

|   |             |             |             |
|---|-------------|-------------|-------------|
| H | 2.520366000 | 2.745101000 | 0.967314000 |
|---|-------------|-------------|-------------|

|   |             |             |             |
|---|-------------|-------------|-------------|
| H | 4.074767000 | 2.855231000 | 0.095691000 |
|---|-------------|-------------|-------------|

|   |              |             |              |
|---|--------------|-------------|--------------|
| C | -3.491522000 | 1.677297000 | -0.042912000 |
|---|--------------|-------------|--------------|

|   |              |             |              |
|---|--------------|-------------|--------------|
| O | -4.433113000 | 0.843934000 | -0.059629000 |
|---|--------------|-------------|--------------|

|   |              |             |              |
|---|--------------|-------------|--------------|
| H | -3.744007000 | 2.751679000 | -0.034533000 |
|---|--------------|-------------|--------------|

|   |              |              |             |
|---|--------------|--------------|-------------|
| O | -4.348350000 | -1.889174000 | 0.065562000 |
|---|--------------|--------------|-------------|

|   |              |              |             |
|---|--------------|--------------|-------------|
| H | -4.213253000 | -2.048825000 | 1.007105000 |
|---|--------------|--------------|-------------|

|   |              |              |              |
|---|--------------|--------------|--------------|
| H | -4.389665000 | -0.907993000 | 0.005148000  |
| C | -1.600143000 | 0.056606000  | -0.048772000 |
| H | -2.318916000 | -0.756287000 | -0.072053000 |
| C | -2.103004000 | 1.372412000  | -0.034175000 |
| H | -1.427032000 | 2.221858000  | -0.017722000 |

#### **Trans-IV**

|   |              |              |              |
|---|--------------|--------------|--------------|
| C | -2.330001000 | 1.268657000  | -0.020284000 |
| C | -1.085245000 | 1.910261000  | -0.041131000 |
| C | -2.393018000 | -0.166294000 | 0.005737000  |
| H | -1.061890000 | 2.993676000  | -0.059530000 |
| C | 0.064570000  | 1.167965000  | -0.038289000 |
| C | -1.245661000 | -0.917952000 | 0.007709000  |
| H | 1.020803000  | 1.674195000  | -0.054819000 |
| H | -1.292899000 | -1.999043000 | 0.026372000  |
| C | 0.031127000  | -0.284178000 | -0.014662000 |
| O | -3.455148000 | 1.976402000  | -0.023971000 |
| H | -4.211272000 | 1.362036000  | -0.008241000 |
| O | -3.655815000 | -0.619367000 | 0.026494000  |
| C | -3.883661000 | -2.027949000 | 0.056441000  |
| H | -3.462113000 | -2.500820000 | -0.833871000 |
| H | -3.443828000 | -2.465372000 | 0.956037000  |
| H | -4.963439000 | -2.155730000 | 0.069919000  |
| C | 3.661111000  | -1.390949000 | -0.033134000 |

|   |             |              |              |
|---|-------------|--------------|--------------|
| O | 4.853980000 | -0.994251000 | -0.044929000 |
| H | 3.467070000 | -2.480168000 | -0.023930000 |
| O | 4.898733000 | 1.741892000  | 0.013992000  |
| H | 4.802935000 | 1.923800000  | 0.956085000  |
| H | 4.955334000 | 0.759011000  | -0.024280000 |
| C | 1.206755000 | -1.061252000 | -0.013675000 |
| H | 1.082651000 | -2.141155000 | 0.001819000  |
| C | 2.517224000 | -0.552237000 | -0.030783000 |
| H | 2.713457000 | 0.515741000  | -0.045822000 |

**Cis-I**

|   |              |              |              |
|---|--------------|--------------|--------------|
| C | -2.213435000 | -0.097291000 | 0.309129000  |
| C | -2.241230000 | -1.483560000 | 0.529903000  |
| C | -1.097494000 | 0.495159000  | -0.277042000 |
| H | -3.140466000 | -1.913857000 | 0.956477000  |
| C | -1.148919000 | -2.271412000 | 0.221709000  |
| C | 0.033863000  | -0.273795000 | -0.580951000 |
| H | -1.174438000 | -3.336241000 | 0.425161000  |
| H | 0.723261000  | 0.090411000  | -1.329652000 |
| C | 0.028974000  | -1.697725000 | -0.286594000 |
| O | -3.305929000 | 0.643204000  | 0.603344000  |
| H | -3.113289000 | 1.560873000  | 0.353118000  |
| O | -1.257704000 | 1.812997000  | -0.556881000 |
| C | -0.193123000 | 2.532520000  | -1.174900000 |



|   |              |              |              |
|---|--------------|--------------|--------------|
| H | 0.688283000  | 2.555806000  | -0.529617000 |
| H | 0.054977000  | 2.101950000  | -2.149517000 |
| H | -0.568225000 | 3.544497000  | -1.319806000 |
| C | 2.651888000  | -0.585487000 | 0.199469000  |
| O | 1.669299000  | 0.112534000  | 0.695119000  |
| H | 3.639889000  | -0.117308000 | 0.217555000  |
| O | 2.395193000  | 2.771871000  | 1.076428000  |
| H | 3.042106000  | 2.874949000  | 0.368406000  |
| H | 2.117873000  | 1.837706000  | 1.003252000  |
| C | 1.224692000  | -2.441586000 | -0.458735000 |
| H | 1.151001000  | -3.518308000 | -0.580257000 |
| C | 2.487401000  | -1.846751000 | -0.363253000 |
| H | 3.376446000  | -2.385756000 | -0.671610000 |

### **Cis-II**

|   |              |              |              |
|---|--------------|--------------|--------------|
| C | -1.942986000 | 1.342333000  | -0.230076000 |
| C | -0.619197000 | 1.641346000  | -0.560120000 |
| C | -2.317553000 | -0.012056000 | 0.061295000  |
| H | -0.362249000 | 2.666554000  | -0.800034000 |
| C | 0.322541000  | 0.643439000  | -0.575587000 |
| C | -1.383397000 | -1.014546000 | 0.039593000  |
| H | 1.334743000  | 0.872604000  | -0.877669000 |
| H | -1.663794000 | -2.035956000 | 0.262846000  |

|   |              |              |              |
|---|--------------|--------------|--------------|
| C | -0.020175000 | -0.726541000 | -0.264129000 |
| O | -2.863053000 | 2.300744000  | -0.181198000 |
| H | -3.716655000 | 1.900072000  | 0.063657000  |
| O | -3.625287000 | -0.129624000 | 0.344153000  |
| C | -4.148886000 | -1.419049000 | 0.658638000  |
| H | -4.010558000 | -2.102482000 | -0.182828000 |
| H | -3.662084000 | -1.821169000 | 1.550670000  |
| H | -5.209712000 | -1.272903000 | 0.848092000  |
| C | 3.175351000  | -0.632624000 | -0.010171000 |
| O | 4.429738000  | -0.681673000 | -0.111304000 |
| H | 2.714716000  | 0.288578000  | 0.381665000  |
| O | 4.990859000  | 1.812544000  | 0.787776000  |
| H | 5.015590000  | 1.679231000  | 1.742105000  |
| H | 4.925200000  | 0.897927000  | 0.429528000  |
| C | 0.917266000  | -1.784772000 | -0.300851000 |
| H | 0.493085000  | -2.785252000 | -0.276752000 |
| C | 2.323046000  | -1.716969000 | -0.354657000 |
| H | 2.847615000  | -2.626495000 | -0.640300000 |

**Molecular structures in the target triplet  $n\pi^*$  state.**

**Van T<sub>2</sub>**

|   |              |              |              |
|---|--------------|--------------|--------------|
| C | -2.020534000 | -0.454581000 | 0.106237000  |
| C | -1.714943000 | -1.805926000 | 0.146856000  |
| C | -0.986244000 | 0.483955000  | -0.045854000 |
| H | -2.522481000 | -2.519744000 | 0.268126000  |
| C | -0.399582000 | -2.234787000 | 0.032106000  |
| C | 0.330211000  | 0.077594000  | -0.160727000 |
| H | -0.173205000 | -3.294793000 | 0.062233000  |
| H | 1.128308000  | 0.805111000  | -0.242670000 |
| C | 0.637183000  | -1.301705000 | -0.126519000 |
| O | -3.309374000 | -0.032681000 | 0.214686000  |
| H | -3.299245000 | 0.935057000  | 0.156646000  |
| O | -1.419521000 | 1.776746000  | -0.059622000 |
| C | -0.462167000 | 2.801245000  | -0.279273000 |
| H | 0.303542000  | 2.803627000  | 0.502303000  |
| H | 0.021436000  | 2.682404000  | -1.253988000 |
| H | -1.010879000 | 3.741392000  | -0.255747000 |
| C | 1.994647000  | -1.755858000 | -0.250743000 |
| O | 2.992787000  | -0.945985000 | -0.453277000 |
| H | 2.282634000  | -2.801073000 | -0.127350000 |
| O | 3.173540000  | 1.769029000  | 0.524911000  |
| H | 2.813176000  | 1.775533000  | 1.420334000  |
| H | 3.496798000  | 0.864212000  | 0.415348000  |

**IsoVan T<sub>2</sub>**

|   |              |              |              |
|---|--------------|--------------|--------------|
| C | 1.534265000  | -0.443568000 | -0.419210000 |
| C | 0.387812000  | -1.202385000 | -0.237993000 |
| C | 1.438638000  | 0.959121000  | -0.403593000 |
| H | 0.484852000  | -2.282875000 | -0.263517000 |
| C | -0.852470000 | -0.610567000 | -0.038690000 |
| C | 0.213415000  | 1.567998000  | -0.196097000 |
| H | -1.741147000 | -1.220330000 | 0.083679000  |
| H | 0.150740000  | 2.652175000  | -0.182906000 |
| C | -0.948135000 | 0.792084000  | -0.007722000 |
| O | 2.734793000  | -1.062675000 | -0.665733000 |
| O | 2.586410000  | 1.661135000  | -0.605643000 |
| C | -2.203550000 | 1.453524000  | 0.208646000  |
| O | -3.318641000 | 0.816000000  | 0.401078000  |
| H | -2.313733000 | 2.539222000  | 0.184337000  |
| O | -4.029611000 | -1.927950000 | 0.177696000  |
| H | -4.084036000 | -1.776846000 | 1.129547000  |
| H | -4.257710000 | -1.067271000 | -0.195999000 |
| C | 3.666846000  | -1.000067000 | 0.411633000  |
| H | 3.257390000  | -1.478685000 | 1.307967000  |
| H | 4.555281000  | -1.543552000 | 0.087933000  |
| H | 3.936666000  | 0.033932000  | 0.641583000  |
| H | 2.400200000  | 2.607720000  | -0.553817000 |

**4HBA T<sub>2</sub>**

|   |              |              |              |
|---|--------------|--------------|--------------|
| C | 2.185836000  | -0.422182000 | 0.003268000  |
| C | 2.112752000  | 0.971121000  | 0.078674000  |
| C | 1.014537000  | -1.169288000 | -0.084563000 |
| C | 0.886361000  | 1.605263000  | 0.064277000  |
| C | -0.222588000 | -0.540108000 | -0.099576000 |
| H | 0.842095000  | 2.687973000  | 0.122912000  |
| H | -1.128349000 | -1.134790000 | -0.163876000 |
| C | -0.308418000 | 0.862628000  | -0.026687000 |
| O | 3.425554000  | -0.987820000 | 0.020622000  |
| H | 3.343730000  | -1.948395000 | -0.038053000 |
| C | -1.571945000 | 1.546595000  | -0.043884000 |
| O | -2.711047000 | 0.923800000  | -0.127759000 |
| H | -1.660638000 | 2.631396000  | 0.029993000  |
| O | -3.395785000 | -1.883306000 | 0.051627000  |
| H | -3.217186000 | -1.984930000 | 0.994752000  |
| H | -3.670249000 | -0.960868000 | -0.028342000 |
| H | 1.067533000  | -2.253140000 | -0.140921000 |
| H | 3.031777000  | 1.542859000  | 0.147955000  |

**Syr T<sub>3</sub>**

|   |              |              |             |
|---|--------------|--------------|-------------|
| C | -1.207379000 | 1.064745000  | 0.017478000 |
| C | -1.825490000 | -0.190590000 | 0.043567000 |

|   |              |              |              |
|---|--------------|--------------|--------------|
| C | 0.182758000  | 1.143760000  | -0.087616000 |
| C | -1.058539000 | -1.345395000 | -0.041513000 |
| C | 0.970874000  | 0.004797000  | -0.173373000 |
| H | -1.528076000 | -2.319692000 | -0.024280000 |
| H | 2.049961000  | 0.073833000  | -0.218706000 |
| C | 0.342139000  | -1.253714000 | -0.154004000 |
| O | -1.964477000 | 2.194265000  | 0.096148000  |
| H | -1.349071000 | 2.942147000  | 0.052487000  |
| O | 0.650273000  | 2.425226000  | -0.092385000 |
| C | 2.042562000  | 2.630074000  | -0.277694000 |
| H | 2.623483000  | 2.159259000  | 0.520922000  |
| H | 2.372109000  | 2.233086000  | -1.242909000 |
| H | 2.197077000  | 3.707652000  | -0.254143000 |
| C | 1.115474000  | -2.459863000 | -0.249397000 |
| O | 2.407285000  | -2.456225000 | -0.402151000 |
| H | 0.684071000  | -3.452551000 | -0.110418000 |
| O | 4.227017000  | -0.463461000 | 0.636869000  |
| H | 3.919115000  | -0.204331000 | 1.514134000  |
| H | 3.891781000  | -1.364750000 | 0.533862000  |
| O | -3.179665000 | -0.166538000 | 0.154811000  |
| C | -3.863429000 | -1.407411000 | 0.177277000  |
| H | -3.696528000 | -1.973725000 | -0.745073000 |
| H | -3.558781000 | -2.017605000 | 1.034106000  |

H -4.922418000 -1.167876000 0.265333000

**ConAld T<sub>3</sub>**

**Trans-I**

C -2.904970000 -0.517591000 -0.040519000

C -2.500317000 -1.839552000 -0.032650000

C -1.934505000 0.500257000 -0.017633000

H -3.254693000 -2.618617000 -0.050454000

C -1.143960000 -2.152247000 -0.002491000

C -0.588636000 0.190626000 0.012383000

H -0.839664000 -3.194083000 0.003206000

H 0.141886000 0.988927000 0.029641000

C -0.164571000 -1.154633000 0.020471000

O -4.224810000 -0.192105000 -0.070059000

H -4.280085000 0.775976000 -0.070885000

O -2.468482000 1.756652000 -0.028434000

C -1.583655000 2.864575000 -0.010131000

H -0.970204000 2.864682000 0.896439000

H -0.931429000 2.863155000 -0.889216000

H -2.209624000 3.755417000 -0.024446000

C 3.650912000 -1.134511000 0.102634000

O 4.679182000 -0.342960000 0.122588000

H 3.929097000 -2.193289000 0.108466000

O 3.797278000 2.163039000 0.117559000

|   |             |              |              |
|---|-------------|--------------|--------------|
| H | 4.390741000 | 1.963397000  | 0.852520000  |
| H | 4.342008000 | 1.999616000  | -0.662616000 |
| C | 1.240046000 | -1.541466000 | 0.050874000  |
| H | 1.427250000 | -2.612696000 | 0.053768000  |
| C | 2.307481000 | -0.698006000 | 0.074409000  |
| H | 2.194986000 | 0.381888000  | 0.073774000  |

### **Trans-II**

|   |              |              |              |
|---|--------------|--------------|--------------|
| C | -2.634811000 | -0.962460000 | -0.024672000 |
| C | -1.803075000 | -2.069780000 | -0.015021000 |
| C | -2.070898000 | 0.322998000  | -0.008266000 |
| H | -2.250810000 | -3.057631000 | -0.026399000 |
| C | -0.421880000 | -1.910460000 | 0.010165000  |
| C | -0.697542000 | 0.481884000  | 0.016841000  |
| H | 0.202044000  | -2.796986000 | 0.019912000  |
| H | -0.263196000 | 1.474558000  | 0.028735000  |
| C | 0.158829000  | -0.637350000 | 0.025435000  |
| O | -3.985962000 | -1.109726000 | -0.048873000 |
| H | -4.370416000 | -0.219511000 | -0.051240000 |
| O | -2.996812000 | 1.326120000  | -0.019774000 |
| C | -2.533598000 | 2.666434000  | -0.006290000 |
| H | -1.952410000 | 2.873942000  | 0.897754000  |
| H | -1.921296000 | 2.881083000  | -0.887853000 |
| H | -3.421479000 | 3.296641000  | -0.019233000 |



|   |             |              |              |
|---|-------------|--------------|--------------|
| C | 3.953054000 | -1.088195000 | 0.061569000  |
| O | 4.451832000 | 0.109218000  | 0.122711000  |
| H | 4.711531000 | -1.872357000 | 0.026235000  |
| O | 3.225268000 | 2.644187000  | 0.043788000  |
| H | 3.593237000 | 2.426053000  | 0.909234000  |
| H | 3.821790000 | 2.192132000  | -0.566114000 |
| C | 1.596893000 | -0.398730000 | 0.050452000  |
| H | 1.902229000 | 0.643765000  | 0.079455000  |
| C | 2.568829000 | -1.356917000 | 0.031203000  |
| H | 2.327885000 | -2.413669000 | -0.012723000 |

**Trans-III**

|   |              |              |              |
|---|--------------|--------------|--------------|
| C | 2.489587000  | -1.145914000 | -0.016988000 |
| C | 1.462820000  | -2.071569000 | -0.003739000 |
| C | 2.181837000  | 0.227098000  | -0.001592000 |
| H | 1.709041000  | -3.127721000 | -0.015118000 |
| C | 0.139077000  | -1.640994000 | 0.023688000  |
| C | 0.868900000  | 0.654235000  | 0.025935000  |
| H | -0.659392000 | -2.376016000 | 0.032826000  |
| H | 0.654474000  | 1.714942000  | 0.041554000  |
| C | -0.186501000 | -0.281374000 | 0.037501000  |
| O | 3.787996000  | -1.545609000 | -0.043183000 |
| H | 4.334181000  | -0.744275000 | -0.047828000 |
| O | 3.286614000  | 1.028373000  | -0.014655000 |

|   |              |              |              |
|---|--------------|--------------|--------------|
| C | 3.098976000  | 2.433949000  | -0.000762000 |
| H | 2.539245000  | 2.765692000  | -0.880982000 |
| H | 2.573173000  | 2.752584000  | 0.904858000  |
| H | 4.094386000  | 2.874953000  | -0.016361000 |
| C | -3.449546000 | 1.708440000  | 0.078904000  |
| O | -4.398394000 | 0.824647000  | 0.152697000  |
| H | -3.815186000 | 2.735806000  | 0.033739000  |
| O | -4.330448000 | -2.000888000 | -0.038826000 |
| H | -4.537953000 | -1.808740000 | 0.884156000  |
| H | -4.710641000 | -1.249233000 | -0.510992000 |
| C | -1.591681000 | 0.102882000  | 0.063597000  |
| H | -2.301360000 | -0.719854000 | 0.088609000  |
| C | -2.078485000 | 1.377929000  | 0.044745000  |
| H | -1.422302000 | 2.240338000  | -0.003514000 |

**Trans-IV**

|   |              |              |              |
|---|--------------|--------------|--------------|
| C | -2.397577000 | 1.283169000  | -0.034924000 |
| C | -1.171380000 | 1.926097000  | -0.036602000 |
| C | -2.438380000 | -0.119686000 | -0.006441000 |
| H | -1.151634000 | 3.010367000  | -0.059879000 |
| C | 0.008516000  | 1.190152000  | -0.010152000 |
| C | -1.265786000 | -0.852284000 | 0.020233000  |
| H | 0.952616000  | 1.722816000  | -0.014169000 |
| H | -1.301089000 | -1.935125000 | 0.042517000  |

|   |              |              |              |
|---|--------------|--------------|--------------|
| C | -0.011792000 | -0.209089000 | 0.019635000  |
| O | -3.556050000 | 1.995528000  | -0.061196000 |
| H | -4.284578000 | 1.355725000  | -0.056696000 |
| O | -3.705217000 | -0.629219000 | -0.008104000 |
| C | -3.862474000 | -2.038251000 | 0.010642000  |
| H | -3.404120000 | -2.498338000 | -0.870500000 |
| H | -3.424639000 | -2.472404000 | 0.915096000  |
| H | -4.935015000 | -2.226155000 | 0.001180000  |
| C | 3.603333000  | -1.426094000 | 0.099120000  |
| O | 4.831729000  | -1.008787000 | 0.123135000  |
| H | 3.525057000  | -2.518054000 | 0.104275000  |
| O | 4.806849000  | 1.646240000  | 0.116023000  |
| H | 5.264134000  | 1.299169000  | 0.892267000  |
| H | 5.313328000  | 1.287012000  | -0.623352000 |
| C | 1.189728000  | -1.034771000 | 0.049562000  |
| H | 1.022073000  | -2.109236000 | 0.055331000  |
| C | 2.472312000  | -0.580390000 | 0.071684000  |
| H | 2.711819000  | 0.478527000  | 0.070568000  |

**CIS-I**

|   |              |              |              |
|---|--------------|--------------|--------------|
| C | -2.833481000 | -0.323507000 | -0.285997000 |
| C | -2.548685000 | -1.679404000 | -0.413049000 |
| C | -1.770888000 | 0.576359000  | 0.137382000  |
| H | -3.334472000 | -2.350562000 | -0.741605000 |

|   |              |              |              |
|---|--------------|--------------|--------------|
| C | -1.273317000 | -2.149177000 | -0.149585000 |
| C | -0.504242000 | 0.096794000  | 0.444599000  |
| H | -1.055956000 | -3.205680000 | -0.259910000 |
| H | 0.265942000  | 0.775736000  | 0.776711000  |
| C | -0.216170000 | -1.261317000 | 0.303243000  |
| O | -4.055936000 | 0.178828000  | -0.572743000 |
| H | -4.031836000 | 1.138261000  | -0.433070000 |
| O | -2.154978000 | 1.852190000  | 0.183922000  |
| C | -1.205300000 | 2.857226000  | 0.547808000  |
| H | -0.883569000 | 2.715798000  | 1.581940000  |
| H | -0.342129000 | 2.819510000  | -0.120771000 |
| H | -1.723011000 | 3.807642000  | 0.444121000  |
| C | 2.750305000  | -0.112028000 | -0.166416000 |
| O | 2.000771000  | 0.610543000  | -0.872213000 |
| H | 3.828891000  | 0.119364000  | -0.127056000 |
| O | 6.222423000  | 0.741184000  | -0.283051000 |
| H | 6.164233000  | 0.240797000  | -1.106326000 |
| H | 5.854382000  | 1.602028000  | -0.517801000 |
| C | 1.074170000  | -1.802881000 | 0.732755000  |
| H | 1.023479000  | -2.756608000 | 1.255728000  |
| C | 2.356969000  | -1.239678000 | 0.594886000  |
| H | 3.159642000  | -1.742565000 | 1.126971000  |

**Cis-II**

|   |              |              |              |
|---|--------------|--------------|--------------|
| C | -1.629902000 | 1.402391000  | -0.024398000 |
| C | -0.303850000 | 1.613990000  | -0.352087000 |
| C | -2.093865000 | 0.086930000  | 0.152645000  |
| H | 0.042711000  | 2.630759000  | -0.502639000 |
| C | 0.568055000  | 0.536449000  | -0.496881000 |
| C | -1.230479000 | -0.981561000 | 0.011825000  |
| H | 1.587600000  | 0.745218000  | -0.788826000 |
| H | -1.590174000 | -1.994194000 | 0.152118000  |
| C | 0.130240000  | -0.777475000 | -0.304208000 |
| O | -2.488383000 | 2.446572000  | 0.118644000  |
| H | -3.356050000 | 2.074071000  | 0.339123000  |
| O | -3.421729000 | 0.014564000  | 0.461219000  |
| C | -3.995976000 | -1.267285000 | 0.655346000  |
| H | -3.914666000 | -1.877100000 | -0.250012000 |
| H | -3.518223000 | -1.791223000 | 1.489291000  |
| H | -5.046721000 | -1.099537000 | 0.886575000  |
| C | 3.324978000  | -1.093807000 | -0.130789000 |
| O | 4.584294000  | -1.368272000 | -0.068944000 |
| H | 3.131269000  | -0.038377000 | 0.137144000  |
| O | 3.346419000  | 1.936904000  | 0.418321000  |
| H | 3.011539000  | 2.048647000  | 1.317280000  |
| H | 4.303415000  | 2.039690000  | 0.503417000  |
| C | 0.980262000  | -1.956139000 | -0.432659000 |

|   |             |              |              |
|---|-------------|--------------|--------------|
| H | 0.441818000 | -2.888483000 | -0.578932000 |
| C | 2.338288000 | -2.080896000 | -0.382086000 |
| H | 2.743294000 | -3.078576000 | -0.526147000 |
